# Supplementary material
Source: PubMed Central journal article supplement (PMC2763235)

**Supplemental Figure: Ethanol decreases mortality after CLP. A)** Untreated wild-type (n=5) and ethanol-treated mice (n=6) underwent CLP and were monitored for survival for 10 days. Ethanol-treated mice were exposed to 20  $\mu$ L over a 24-hour period. p=0.003.

# Supplemental Figure

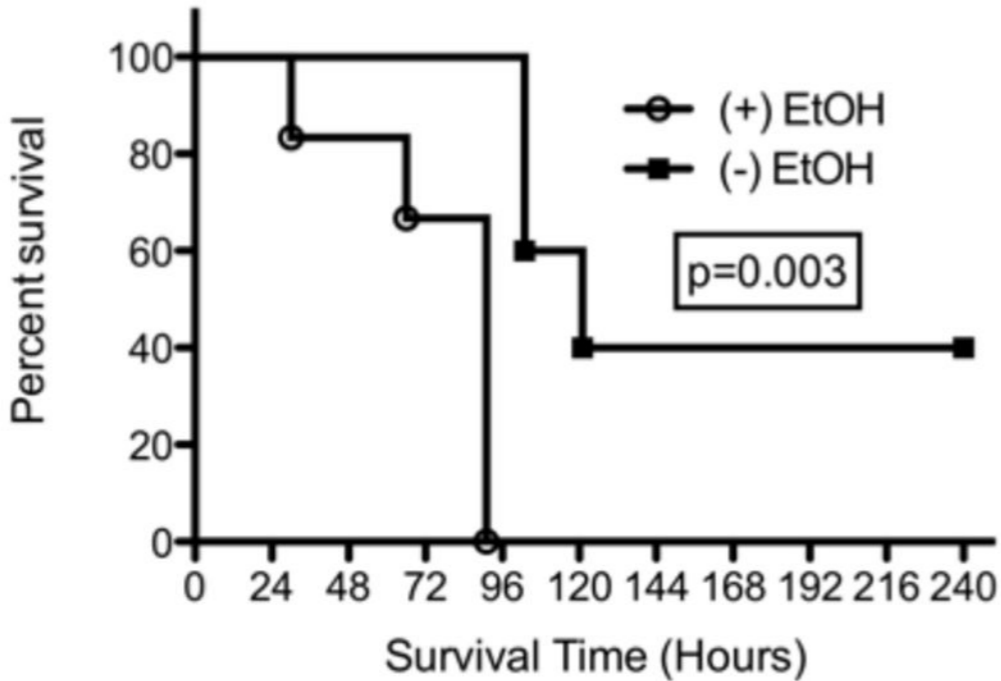

Supplement: NIHMS128372-supplement-Supplement.pdf [file NIHMS128372-supplement-Supplement.pdf]
